# Supplementary material for: Construction and Evaluation of Chitosan-Based Nanoparticles for Oral Administration of Exenatide in Type 2 Diabetic Rats
Source: MDPI journal article supplement (doi:10.3390/polym14112181), 2022-05-27
Supplement: s1 [file s1]

## Supplementary Information

# Construction and Evaluation of Chitosan-Based Nanoparticles for Oral Administration of Exenatide in Type 2 Diabetic Rats

Jian-Miao Yang <sup>1,2,†</sup>, Lin-Jie Wu <sup>3,†</sup>, Meng-Ting Lin <sup>3</sup>, Yi-Ying Lu <sup>3</sup>, Tian-Tian Wang <sup>1,3</sup>, Min Han <sup>3,\*</sup>,  
Bin Zhang <sup>4,\*</sup> and Dong-Hang Xu <sup>1,\*</sup>

Department of Pharmacy, The Second Affiliated Hospital, College of Medicine, Zhejiang University, Hangzhou 310009, China; yangjm@enzemed.com (J.-M.Y.); 15574881635@163.com (T.-T.W.)

<sup>2</sup> Taizhou Hospital of Zhejiang Province, Zhejiang University, Taizhou 317099, China

<sup>3</sup> Institute of Pharmaceutics, College of Pharmaceutical Sciences, Zhejiang University, Hangzhou 310058, China; 22119114@zju.edu.cn (L.-J.W.); 15700060560@163.com (M.-T.L.); 21919089@zju.edu.cn (Y.-Y.L.)

<sup>4</sup> Zhejiang Strong Pharmaceutical Co., Ltd., Hangzhou 311500, China

\* Correspondence: hanmin@zju.edu.cn (M.H.); zhangbin1@cnstrong.cn (B.Z.); xudonghang@zju.edu.cn (D.-H.X.); Tel.: +86-571-88208437 (M.H.); +86-571-87784529 (D.-H.X.)

† These authors contributed equally to this work.

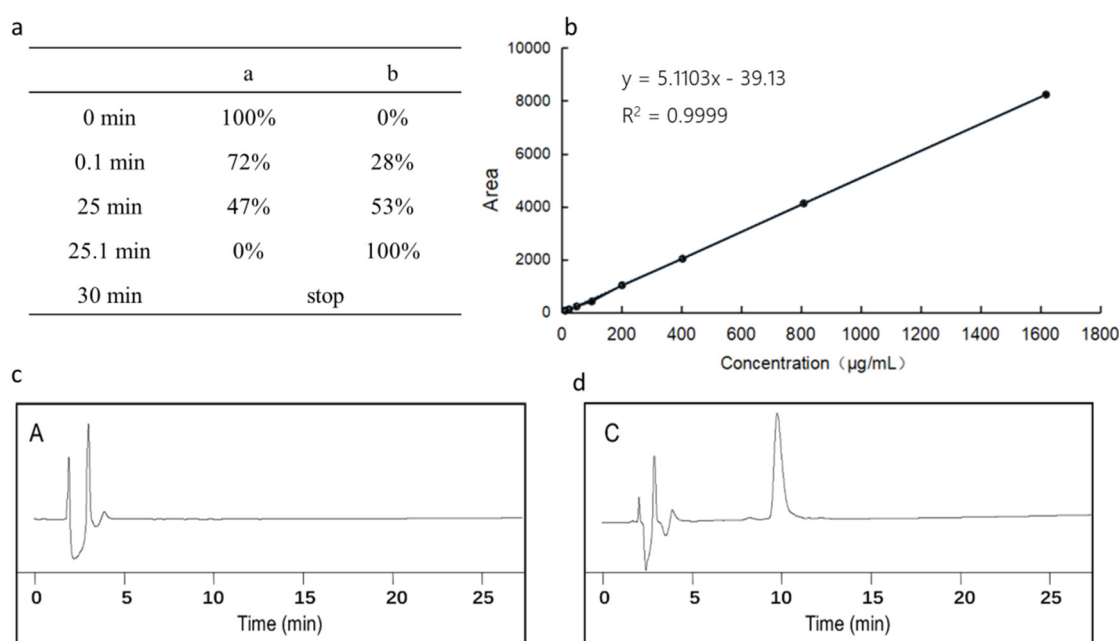

**Figure S1.** (a) High performance liquid chromatography conditions. (b) Standard curve of exenatide. (c-d) Specificity: HPLC chromatograms of methanol (c) and exenatide (d).

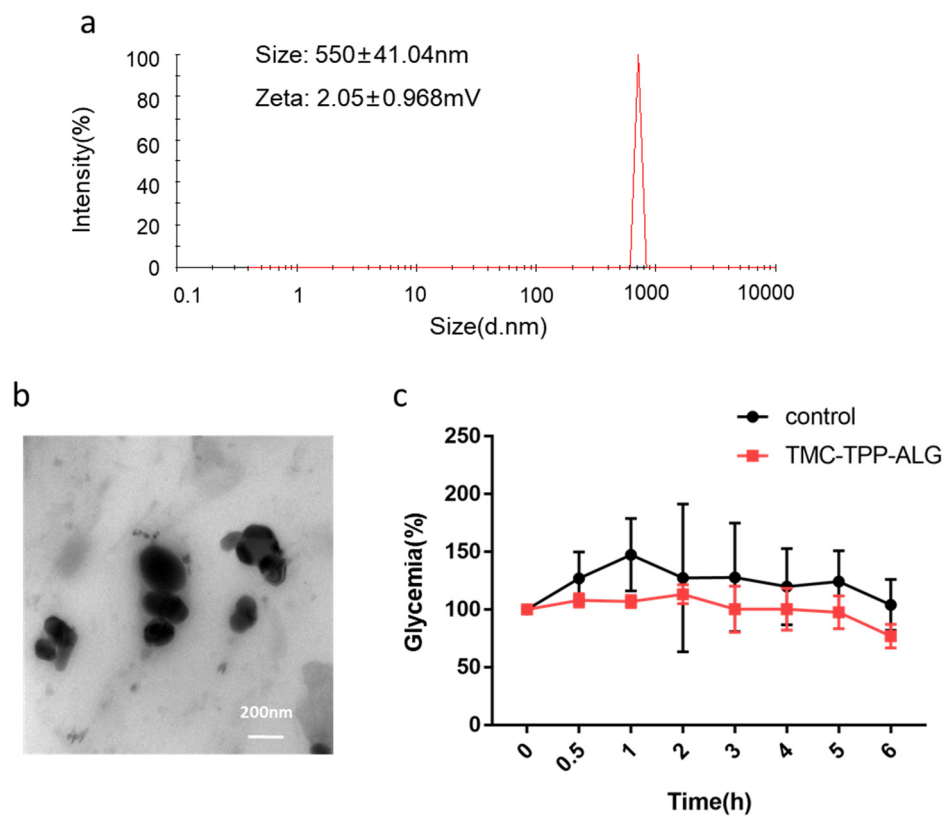

**Figure S2.** (a) The size distribution and zeta potential of TMC-TPP-ALG. (b) TEM image of TMC-TPP-ALG. (c) Pharmacodynamics of exenatide in rats with oral administration of TMC-TPP-ALG at a dose of  $650 \mu\text{g/kg}$ .

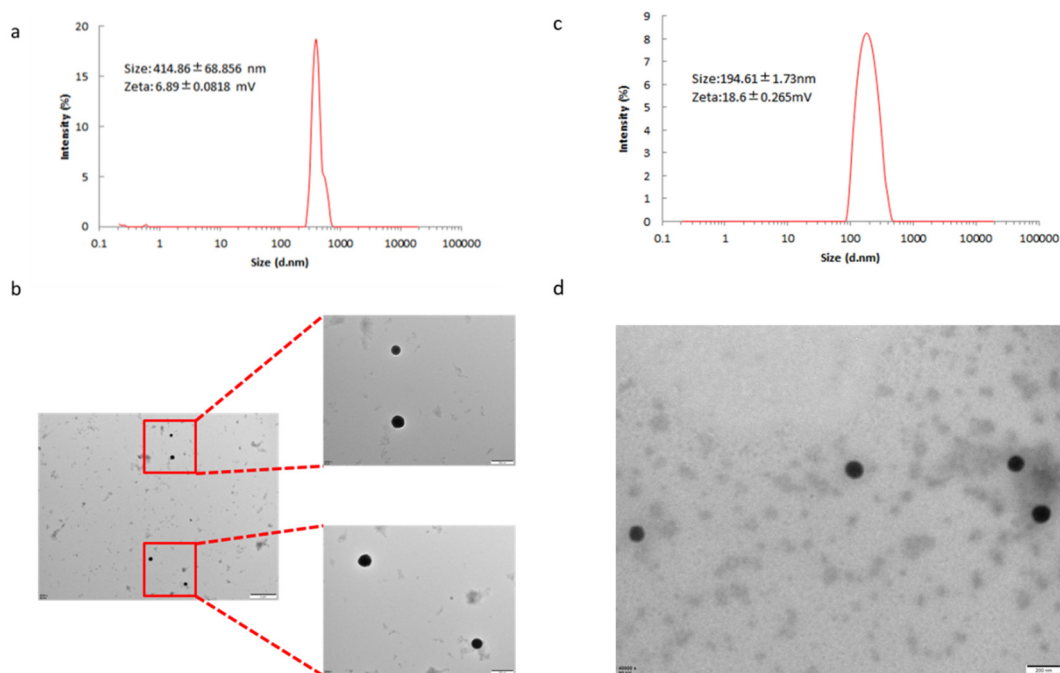

**Figure S3.** Characterization and morphology analysis of Rho-NPs and CS-TTP. (a) The size distribution and zeta potential of Rho-NPs. (b) TEM images of Rho-NPs. The scale bars of the left figure and right figures are 2  $\mu$ m and 500 nm, respectively. (c) The size distribution and zeta potential of CS-TTP. (d) TEM image of CS-TTP. The scale bar: 200 nm
